# Supplementary material for: Synthesis, nanostructuring and in silico studies of a new imine bond containing a macroheterocycle as a promising PBP-2a non-β-lactam inhibitor
Source: Royal Society of Chemistry journal article supplement (doi:10.1039/d3tb00602f), 2023-01-01
Supplement: d3tb00602f1.pdf [file d3tb00602f1.pdf]

## Synthesis, nanostructuring and *in silico* studies of a new imine bond containing macroheterocycle as a promising PBP-2a non- $\beta$ -lactam inhibitor

Alakbar Huseynzada<sup>\*a,c,e,p</sup>, Mirjavid Aghayev<sup>d</sup>, Sarvinaz Hajiyeva<sup>a,q</sup>, Aygun Israyilova<sup>b,c,f,o,p</sup>, Koray Sayin<sup>g</sup>, Eldar Gasimov<sup>h</sup>, Fuad Rzayev<sup>i</sup>, Ulviyya Hasanova<sup>a,c,p</sup>, Goncha Eyvazova<sup>j</sup>, Vagif Abbasov<sup>k</sup>, Zarema Gakhramanova<sup>c</sup>, Sanam Huseynova<sup>o</sup>, Parvana Huseynova<sup>l</sup>, Lala Huseynova<sup>m</sup>, Nigar Salimova<sup>n</sup>

<sup>a</sup>ICRL, Baku State University, Z. Khalilov 23, Baku, AZ 1148, Azerbaijan.

<sup>b</sup>Laboratory of Microbiology and Virology, Baku State University, Z. Khalilov 23, Baku, AZ 1148, Azerbaijan.

<sup>c</sup>GPOGC SRI, Azerbaijan State Oil and Industry University, Baku, AZ 1010, Azerbaijan.

<sup>d</sup>Department of Pharmaceutical Sciences, Northeast Ohio Medical University, 4209 St, OH-44, Rootstown, OH 44272, USA

<sup>e</sup>Chemistry Department, Azerbaijan Engineers Union, Bashir Safaroglu 118, Baku, AZ 1009, Azerbaijan

<sup>f</sup>Research Institute of Crop Husbandry, Ministry of Agriculture, Baku, AZ 1098, Azerbaijan

<sup>g</sup>Chemistry Department, Faculty of Science, Sivas Cumhuriyet University, Sivas, 58140, Türkiye

<sup>h</sup>Department of Cytology, Embryology and Histology, Azerbaijan Medical University, 163 A Samad Vurgun, Baku AZ1078, Azerbaijan

<sup>i</sup>Laboratory of Electron Microscopy of the SRC, Azerbaijan Medical University, 163 A Samad Vurgun, Baku AZ1078, Azerbaijan

<sup>j</sup>Nanoresearch Center, Baku State University, Z. Khalilov 23, Baku, AZ 1148, Azerbaijan

<sup>k</sup>Institute of Petrochemical Processes, K. Avenue 30, Baku, AZ 1005, Azerbaijan

<sup>l</sup>Chemistry Department, Ganja State University, H. Aliyev 429, Ganja, AZ 2001, Azerbaijan

<sup>m</sup>Industrial Safety and Labor Protection Department, Azerbaijan State Oil and Industry University, Baku, AZ 1010, Azerbaijan

<sup>n</sup>Petrochemical Technology and Industrial Ecology Department, Azerbaijan State Oil and Industry University, Baku, AZ 1010, Azerbaijan

<sup>o</sup>Department of Molecular Biology and Biotechnology, Baku State University, Z. Khalilov 23, Baku, AZ 1148, Azerbaijan

<sup>p</sup>ICESCO Biomedical Materials Department, Baku State University, Z. Khalilov 23, Baku, AZ 1148, Azerbaijan

<sup>q</sup>Physics Department, Kent State University, 800 E. Summit St., Kent, OH 44242, USA

## Supplementary Materials

### Table of contents

|                              |   |
|------------------------------|---|
| 1. NMR spectra.....          | 2 |
| 2. MS spectrum.....          | 4 |
| 3. FTIR spectra.....         | 5 |
| 4. PXRD data.....            | 6 |
| 5. Statistical analyses..... | 7 |

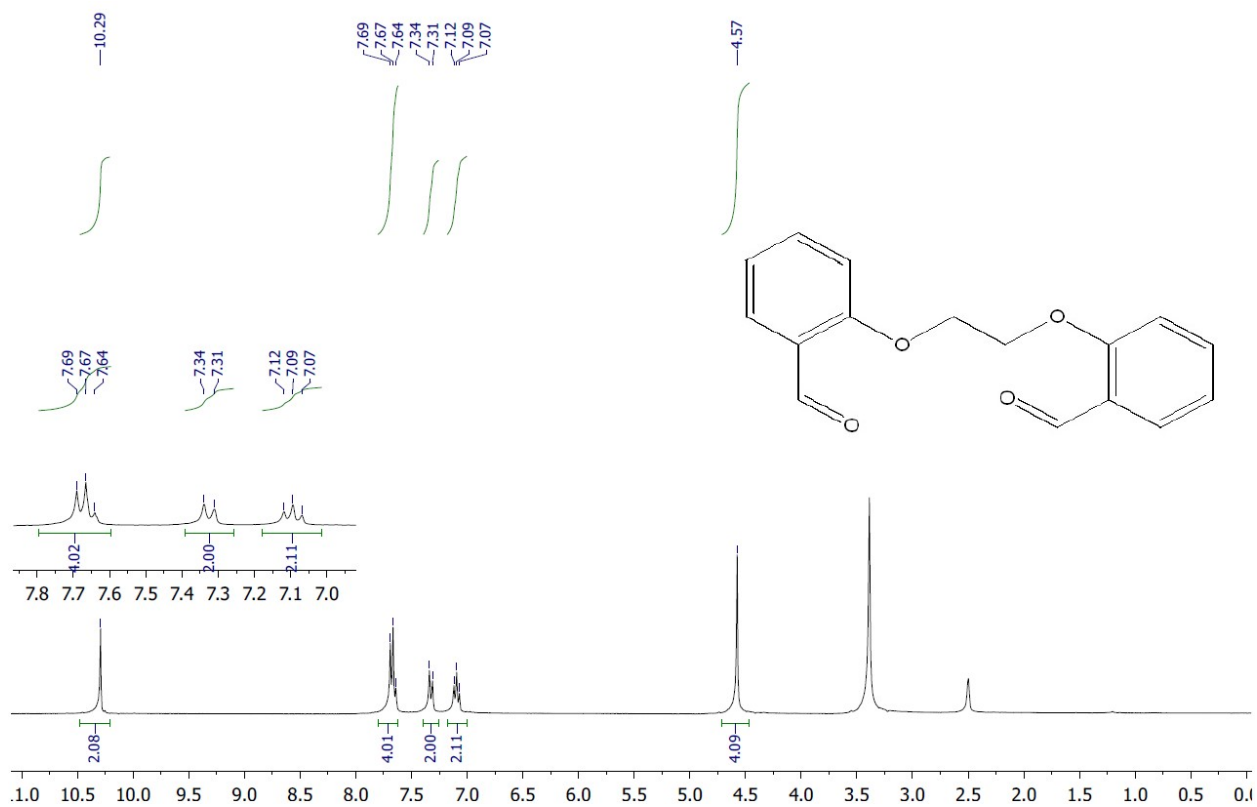

Figure 1S.  $^1\text{H}$  NMR spectrum of synthesized dialdehyde **1**

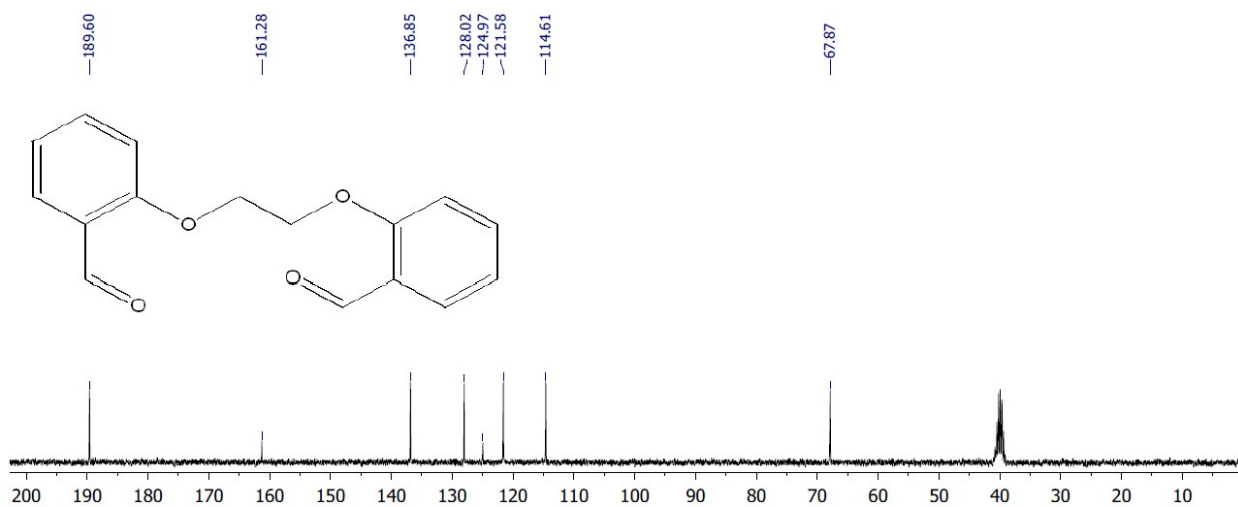

Figure 2S.  $^{13}\text{C}$  NMR spectrum of synthesized dialdehyde **1**

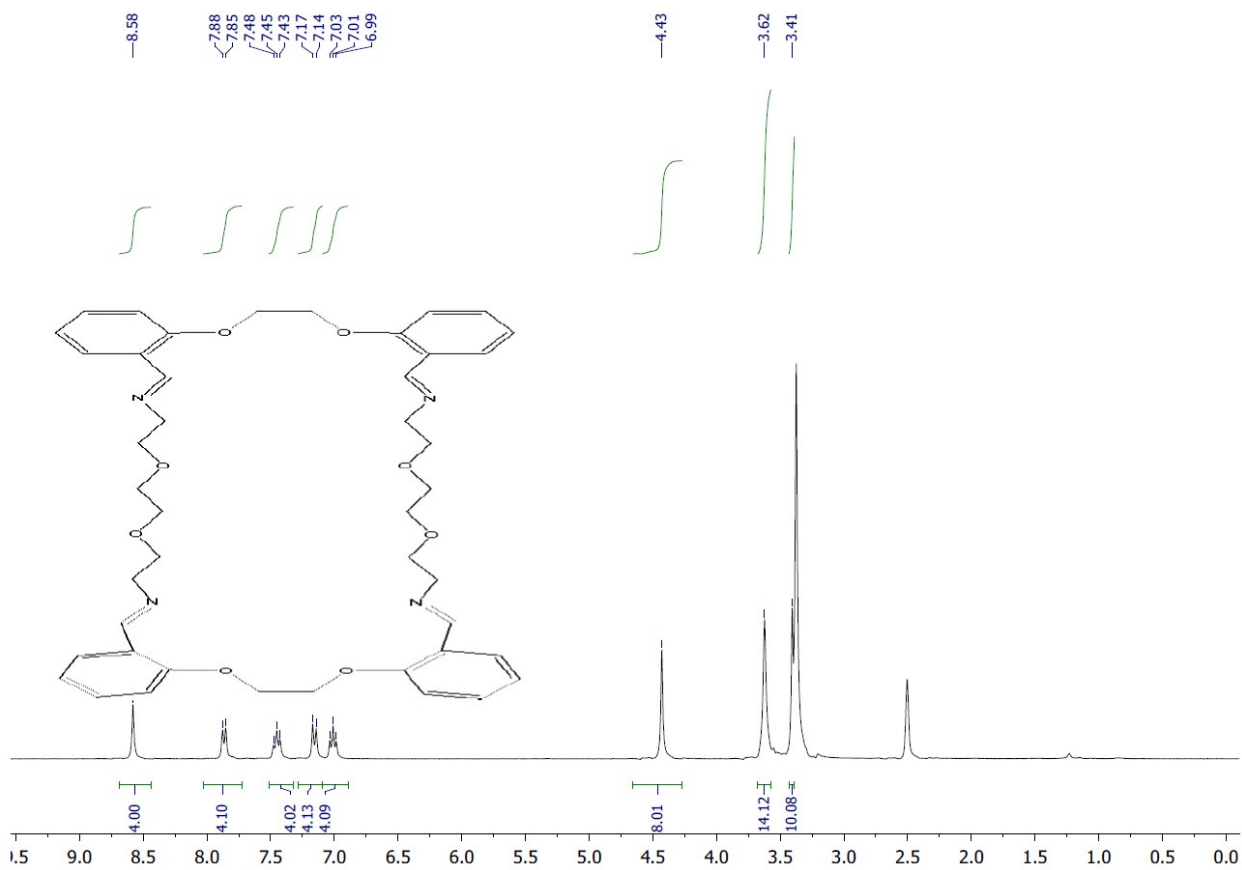

**Figure 3S.**  $^1\text{H}$  NMR spectrum of synthesized macrocycle **3**

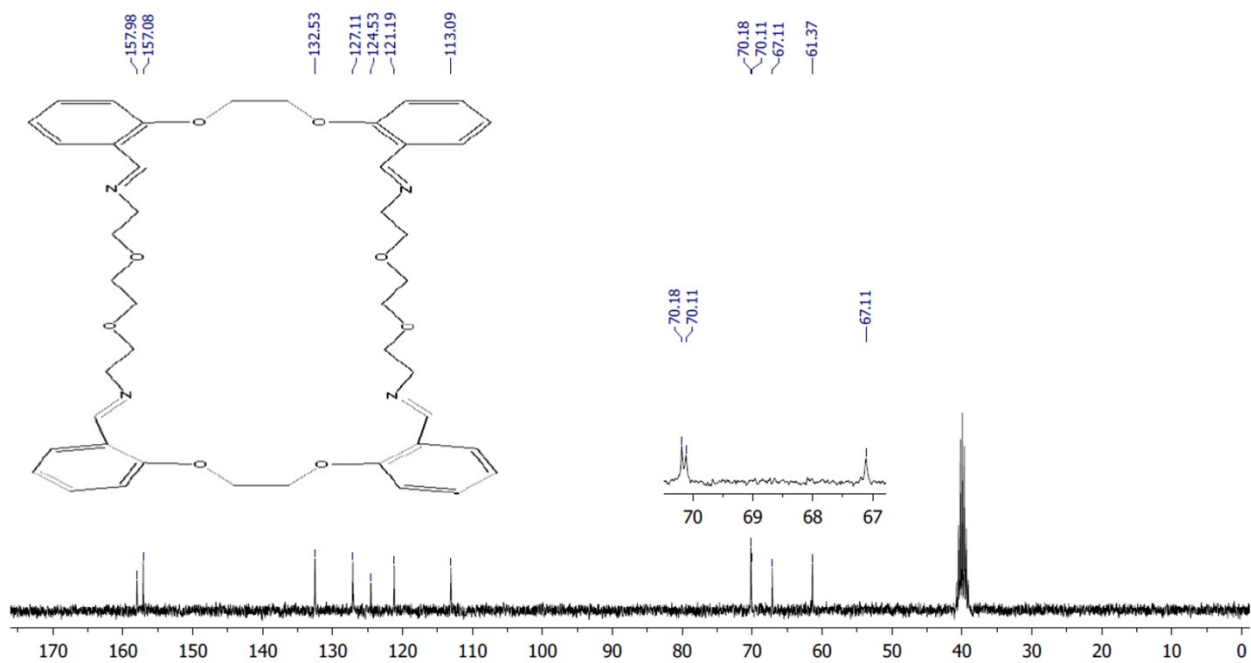

**Figure 4S.**  $^{13}\text{C}$  NMR spectrum of synthesized macrocycle **3**

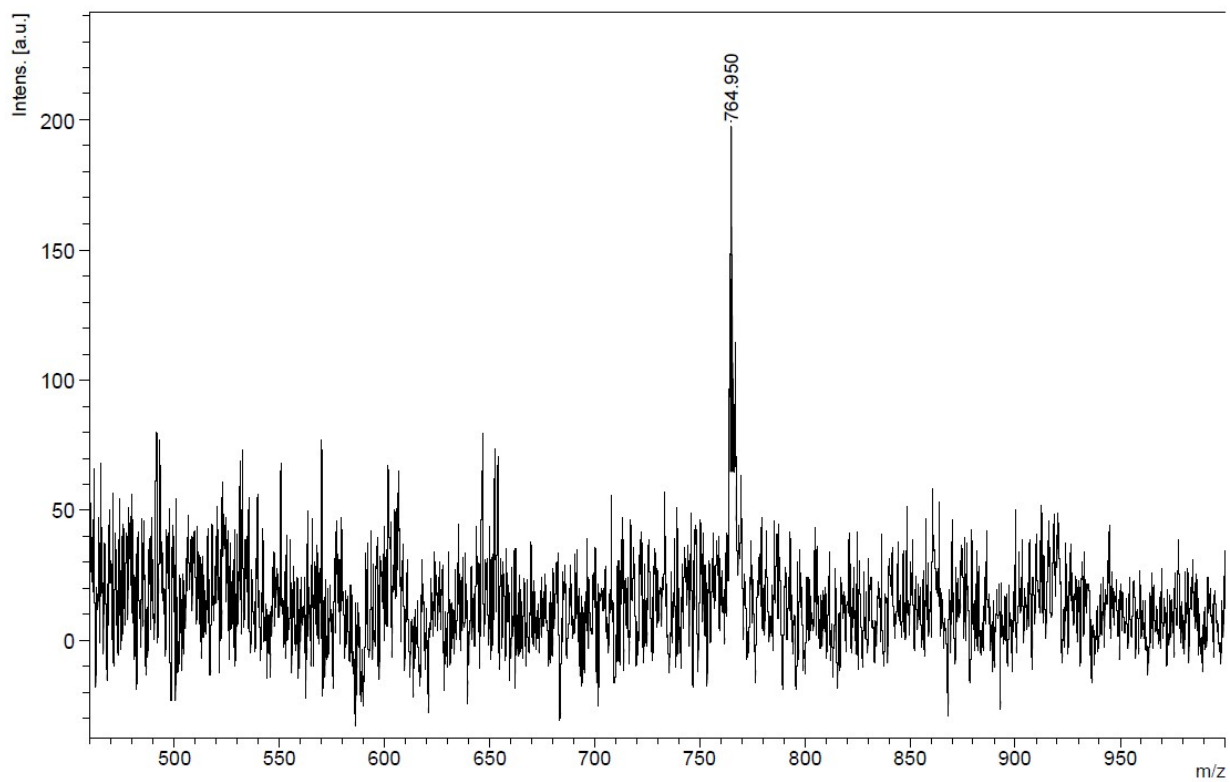

**Figure 5S.** MALDI-MS spectrum of synthesized macrocycle **3**

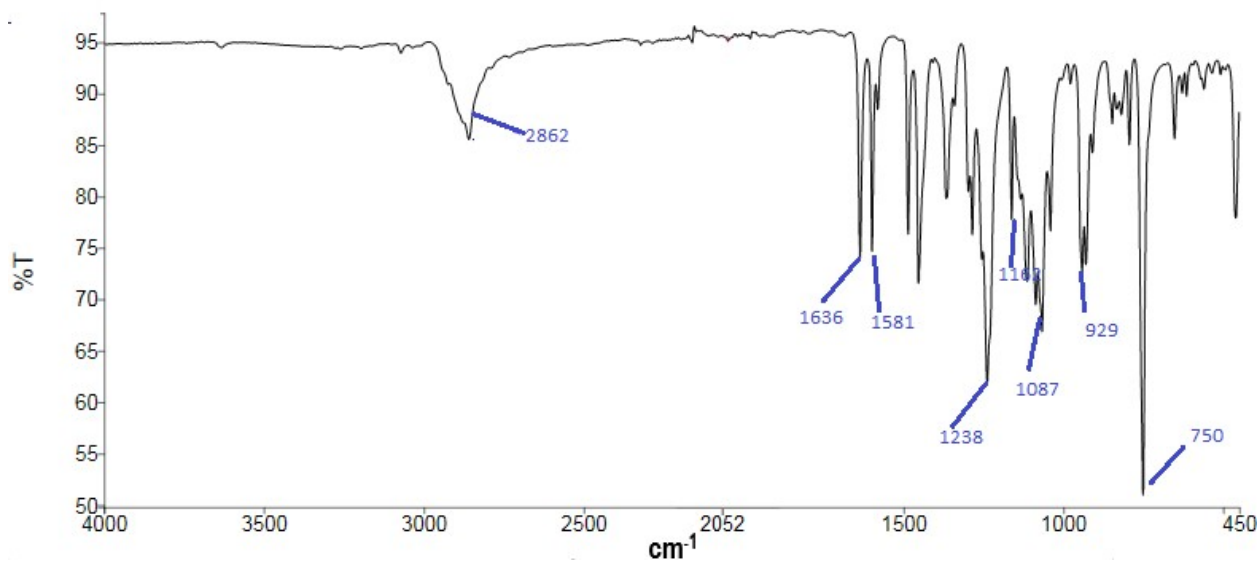

**Figure 6S.** FTIR spectrum of the MHC3

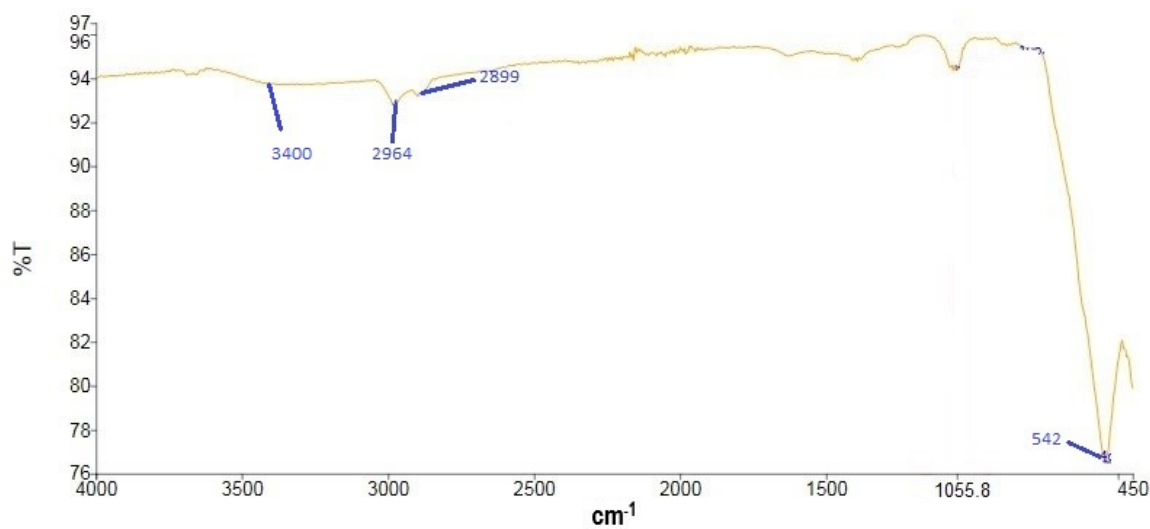

**Figure 7S.** FTIR spectrum of the magnetite nanoparticles

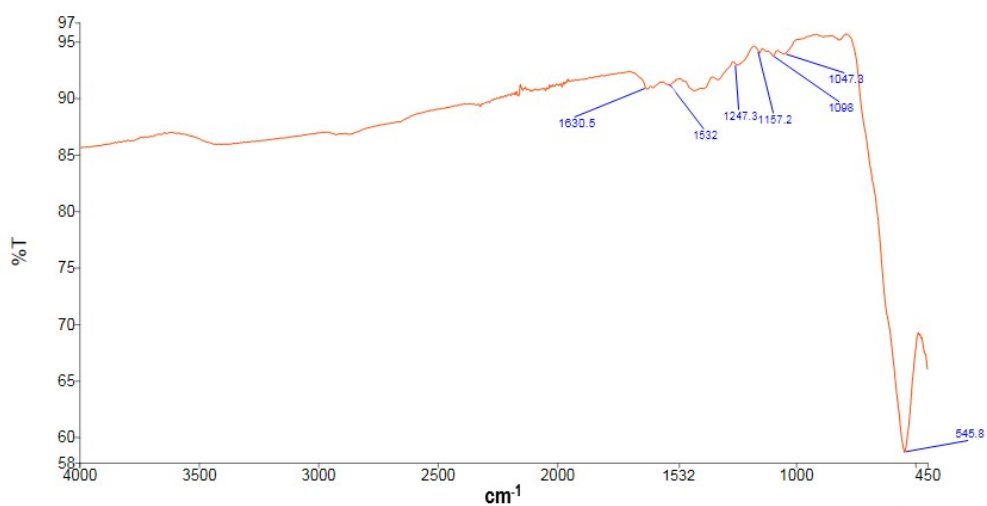

**Figure 8S.** FTIR spectrum of the MHC3@Fe<sub>3</sub>O<sub>4</sub>

**Table 1S.** Powder XRD qualitative results and peak list of the MHC3@Fe<sub>3</sub>O<sub>4</sub>

|            |                                |                      |                               |                |
|------------|--------------------------------|----------------------|-------------------------------|----------------|
| Phase name | Formula                        | Figure of merit      | Phase reg. detail             | DB card number |
| Magnetite  | Fe <sub>3</sub> O <sub>4</sub> | 0.789                | ICDD (PDF-2/Release 2011 RDB) | 00-001-1111    |
| Phase name | Formula                        | Space group          | Phase reg. detail             | DB card number |
| Magnetite  | Fe <sub>3</sub> O <sub>4</sub> | 227 : Fd-3m,choice-2 | ICDD (PDF-2/Release 2011 RDB) | 00-001-1111    |

| No. | 2-theta(deg) | Interplanar spacing ( <i>d</i> spacing) (Å°) | Height(cps) | FWHM(deg) | Int. I(cps deg) | Int. W(deg) | Asym. factor | Miller indices (hkl) |
|-----|--------------|----------------------------------------------|-------------|-----------|-----------------|-------------|--------------|----------------------|
| 1   | 12.6(3)      | 7.04(15)                                     | 246(20)     | 2.6(2)    | 691(97)         | 2.8(6)      | 0.9(4)       | (111)                |
| 2   | 30.13(4)     | 2.964(4)                                     | 1221(45)    | 0.68(5)   | 1208(64)        | 0.99(9)     | 0.9(3)       | (220)                |
| 3   | 35.536(13)   | 2.5242(9)                                    | 3873(80)    | 0.633(12) | 3094(57)        | 0.80(3)     | 1.18(1)      | (311)                |
| 4   | 43.17(6)     | 2.094(3)                                     | 949(40)     | 0.74(8)   | 1164(59)        | 1.23(11)    | 1.1(5)       | (400)                |
| 5   | 57.07(4)     | 1.6126(11)                                   | 1193(45)    | 0.72(4)   | 911(63)         | 0.76(8)     | 0.9(2)       | (333) (511)          |
| 6   | 62.75(3)     | 1.4796(7)                                    | 1738(54)    | 0.79(3)   | 1676(62)        | 0.96(7)     | 1.1(2)       | (440)                |

**Table 2S.** Crystallite size of the MHC3@Fe<sub>3</sub>O<sub>4</sub>

| Data set name                       | Crystallite size(A) | Phase name | Crystallite size(A) |
|-------------------------------------|---------------------|------------|---------------------|
| MHC3@Fe <sub>3</sub> O <sub>4</sub> | 91(12)              | Magnetite  | 91(12)              |

All the MIC experiments were done in triplicate (Table 1). The box and whisker plot does not demonstrate any variations in the results, because the MIC test done by the application of resazurin disodium salt is considered a precise method, which if performed appropriately and for individual compounds provides identical values for each compound in triplicate (Figure 1).

Table 3S. Results of triplicate 96-well microtiter assay of tested compounds on bacterial strains

| Bacterial strains    | MIC, $\mu\text{g/mL}$ |      |      |                           |                           |                           |                             | Ampicillin | Ampicillin |
|----------------------|-----------------------|------|------|---------------------------|---------------------------|---------------------------|-----------------------------|------------|------------|
|                      | MHC3                  | MHC3 | MHC3 | MHC3                      | MHC3                      | MHC3                      | $\text{Fe}_3\text{O}_4$ NPs |            |            |
|                      |                       |      |      | @ $\text{Fe}_3\text{O}_4$ | @ $\text{Fe}_3\text{O}_4$ | @ $\text{Fe}_3\text{O}_4$ |                             |            |            |
| <i>K. pneumoniae</i> | 512                   | 512  | 512  | >1024                     | >1024                     | >1024                     | -                           | 512        | 512        |
| <i>P. aeruginosa</i> | 256                   | 256  | 256  | 1024                      | 1024                      | 1024                      | -                           | 512        | 512        |
| <i>S. aureus</i>     | 32                    | 32   | 32   | 0.5                       | 0.5                       | 0.5                       | -                           | 16         | 16         |

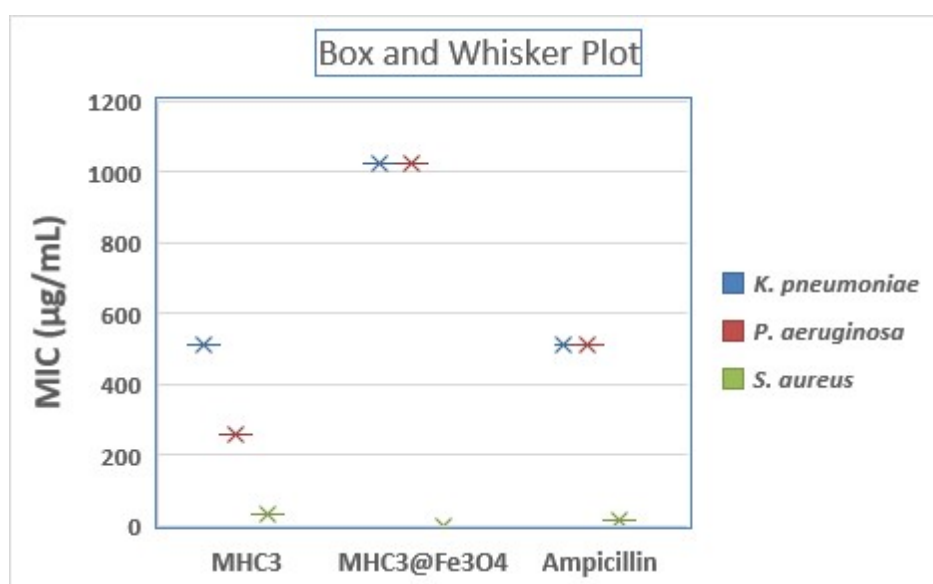

Figure 9S. The Box and Whisker plot for the results of the 96-well microtiter assay

The two-way and post hoc ANOVA were applied to the obtained results by using GraphPad Prism (version 9 for Windows, GraphPad Software, San Diego, CA, USA, www.graphpad.com). Post hoc analysis by two-way ANOVA was applied as multiple comparisons in three families (Figure 2, Table 2). The antibacterial activity of tested compounds on three bacterial strains was compared with each other and ampicillin as a control. The adjusted P value is less than 5%, so the obtained results can be considered significantly different. The only not significant difference has been observed for ampicillin and MHC3 activity towards *Klebsiella pneumoniae* because values of MIC for both compounds were equal to 512  $\mu\text{g/mL}$ .

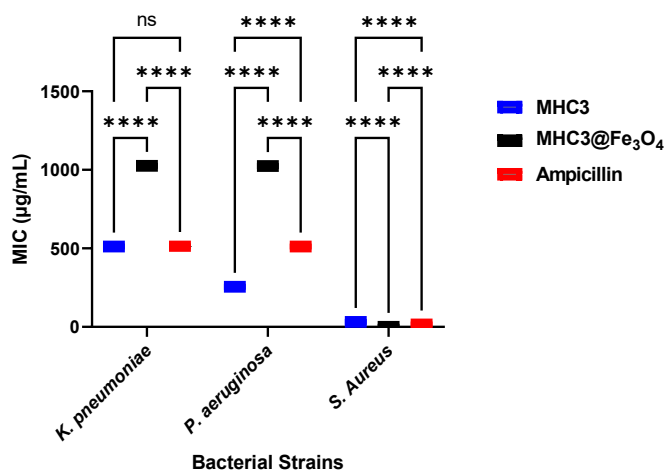

Figure 10S. ANOVA: Tukey's multiple comparisons results

Table 4S. ANOVA: Tukey's multiple comparisons results

| Number of comparisons per family                   | 3          |                    |                  |             |                  |    |     |     |
|----------------------------------------------------|------------|--------------------|------------------|-------------|------------------|----|-----|-----|
| Alpha                                              | 0.05       |                    |                  |             |                  |    |     |     |
| Tukey's multiple comparisons test                  | Mean Diff. | 95.00% CI of diff. | Below threshold? | Summary     | Adjusted P Value |    |     |     |
| <b><i>K. pneumoniae</i></b>                        |            |                    |                  |             |                  |    |     |     |
| MHC3 vs. MHC3@Fe <sub>3</sub> O <sub>4</sub>       | -513.0     | -514.2 to -511.8   | Yes              | ****        | <0.0001          |    |     |     |
| MHC3 vs. Ampicillin                                | -1.000     | -2.203 to 0.2031   | No               | ns          | 0.1135           |    |     |     |
| MHC3@Fe <sub>3</sub> O <sub>4</sub> vs. Ampicillin | 512.0      | 510.8 to 513.2     | Yes              | ****        | <0.0001          |    |     |     |
| <b><i>P. aeruginosa</i></b>                        |            |                    |                  |             |                  |    |     |     |
| MHC3 vs. MHC3@Fe <sub>3</sub> O <sub>4</sub>       | -768.0     | -769.2 to -766.8   | Yes              | ****        | <0.0001          |    |     |     |
| MHC3 vs. Ampicillin                                | -256.0     | -257.2 to -254.8   | Yes              | ****        | <0.0001          |    |     |     |
| MHC3@Fe <sub>3</sub> O <sub>4</sub> vs. Ampicillin | 512.0      | 510.8 to 513.2     | Yes              | ****        | <0.0001          |    |     |     |
| <b><i>S. Aureus</i></b>                            |            |                    |                  |             |                  |    |     |     |
| MHC3 vs. MHC3@Fe <sub>3</sub> O <sub>4</sub>       | 31.50      | 30.30 to 32.70     | Yes              | ****        | <0.0001          |    |     |     |
| MHC3 vs. Ampicillin                                | 16.00      | 14.80 to 17.20     | Yes              | ****        | <0.0001          |    |     |     |
| MHC3@Fe <sub>3</sub> O <sub>4</sub> vs. Ampicillin | -15.50     | -16.70 to -14.30   | Yes              | ****        | <0.0001          |    |     |     |
| <b>Test details</b>                                |            |                    |                  |             |                  |    |     |     |
|                                                    | Mean 1     | Mean 2             | Mean Diff.       | SE of diff. | N1               | N2 | q   | DF  |
| <b><i>K. pneumoniae</i></b>                        |            |                    |                  |             |                  |    |     |     |
| MHC3 vs. MHC3@Fe <sub>3</sub> O <sub>4</sub>       | 512.0      | 1025               | -513.0           | 0.4714      | 3                | 3  | 153 | 18. |



|                                                       |        |        |        |        |   |   |           |           |
|-------------------------------------------------------|--------|--------|--------|--------|---|---|-----------|-----------|
|                                                       |        |        |        |        |   |   | 9         | 00        |
| MHC3 vs. Ampicillin                                   | 512.0  | 513.0  | -1.000 | 0.4714 | 3 | 3 | 3.0<br>00 | 18.<br>00 |
| MHC3@Fe <sub>3</sub> O <sub>4</sub> vs.<br>Ampicillin | 1025   | 513.0  | 512.0  | 0.4714 | 3 | 3 | 153<br>6  | 18.<br>00 |
| <b><i>P. aeruginosa</i></b>                           |        |        |        |        |   |   |           |           |
| MHC3 vs. MHC3@Fe <sub>3</sub> O <sub>4</sub>          | 256.0  | 1024   | -768.0 | 0.4714 | 3 | 3 | 230<br>4  | 18.<br>00 |
| MHC3 vs. Ampicillin                                   | 256.0  | 512.0  | -256.0 | 0.4714 | 3 | 3 | 768<br>.0 | 18.<br>00 |
| MHC3@Fe <sub>3</sub> O <sub>4</sub> vs.<br>Ampicillin | 1024   | 512.0  | 512.0  | 0.4714 | 3 | 3 | 153<br>6  | 18.<br>00 |
| <b><i>S. Aureus</i></b>                               |        |        |        |        |   |   |           |           |
| MHC3 vs. MHC3@Fe <sub>3</sub> O <sub>4</sub>          | 32.00  | 0.5000 | 31.50  | 0.4714 | 3 | 3 | 94.<br>50 | 18.<br>00 |
| MHC3 vs. Ampicillin                                   | 32.00  | 16.00  | 16.00  | 0.4714 | 3 | 3 | 48.<br>00 | 18.<br>00 |
| MHC3@Fe <sub>3</sub> O <sub>4</sub> vs.<br>Ampicillin | 0.5000 | 16.00  | -15.50 | 0.4714 | 3 | 3 | 46.<br>50 | 18.<br>00 |
